# Supplementary material
Source: Springer Nature journal article supplement (https://www.springermedizin.de/resource/supplementary/12963_2012_206_MOESM6_ESM.pdf/9572344)

Food security component of height-for-age

0.5  
0.0  
-0.5  
-1.0

0 5 10 15 20 25

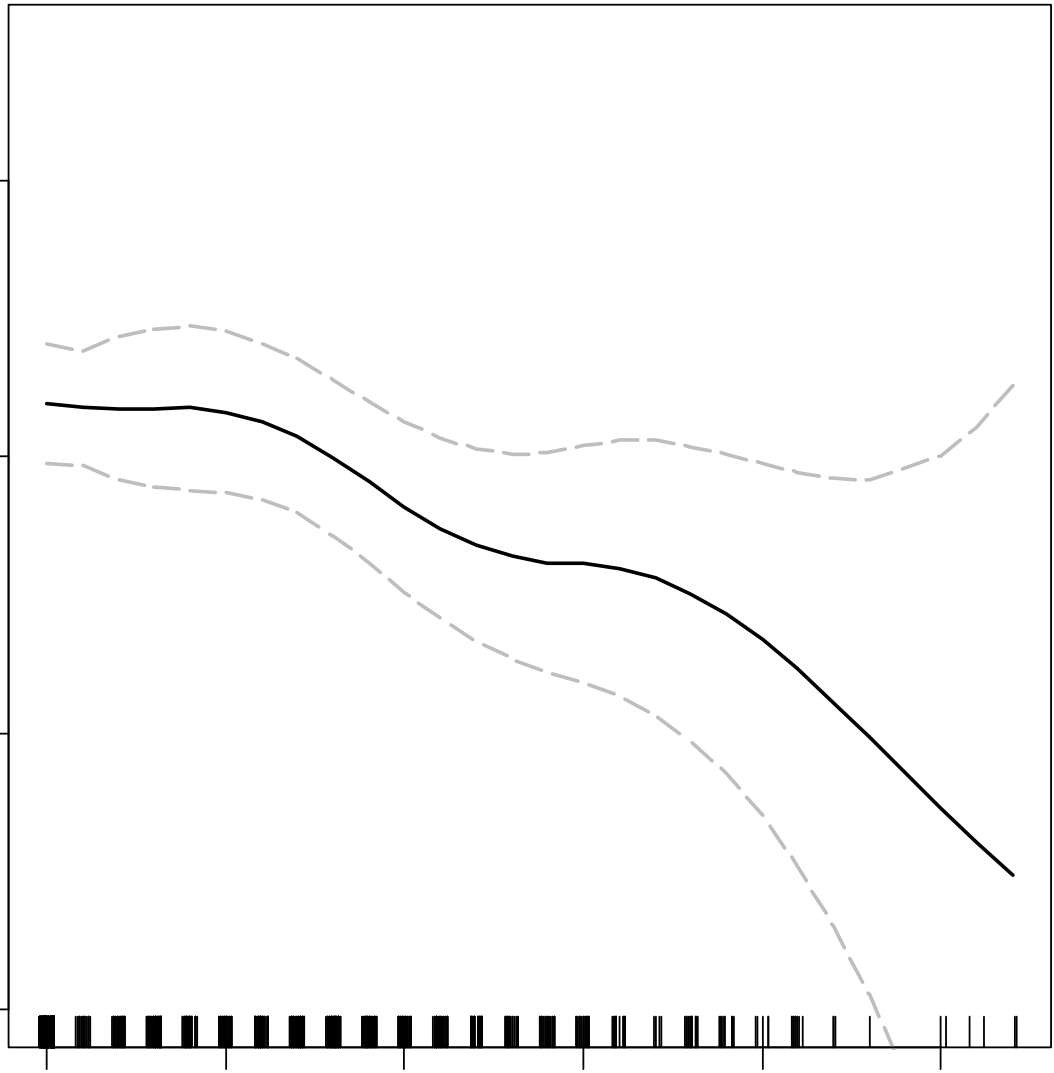

Supplement: MOESM6 [file 9572344]
